# Supplementary material for: Single-atom Pt Doped Nanoceria for Enhanced Cell Phagocytosis and Nanozyme Activities in Keratitis Immune Regulation
Source: Research Square preprint supplement (doi:10.21203/rs.3.rs-7588173/v1), 2025-10-06
Supplement: Supplementary file 1 [file 5c5406bd42b39c68b36ce9b1.docx]

Supporting Information

**Single-atom Pt Doped Nanoceria for Enhanced Cell Phagocytosis and Nanozyme** **Activities in Keratitis Immune Regulation**

Jianguo Zhao1, #, Wanqing Lou2, #, Yixin Wang3, #, Lu Wang4, Xiaoqian Jin1, Chenyang Wang4, Jinjin Zhang5, Wenjuan Zhuang5, Jiayi Wei4, Dajun Lin4, Yishun Guo1, Yi Shao5, *, Zipei Jiang1, * and Bailiang Wang4, *


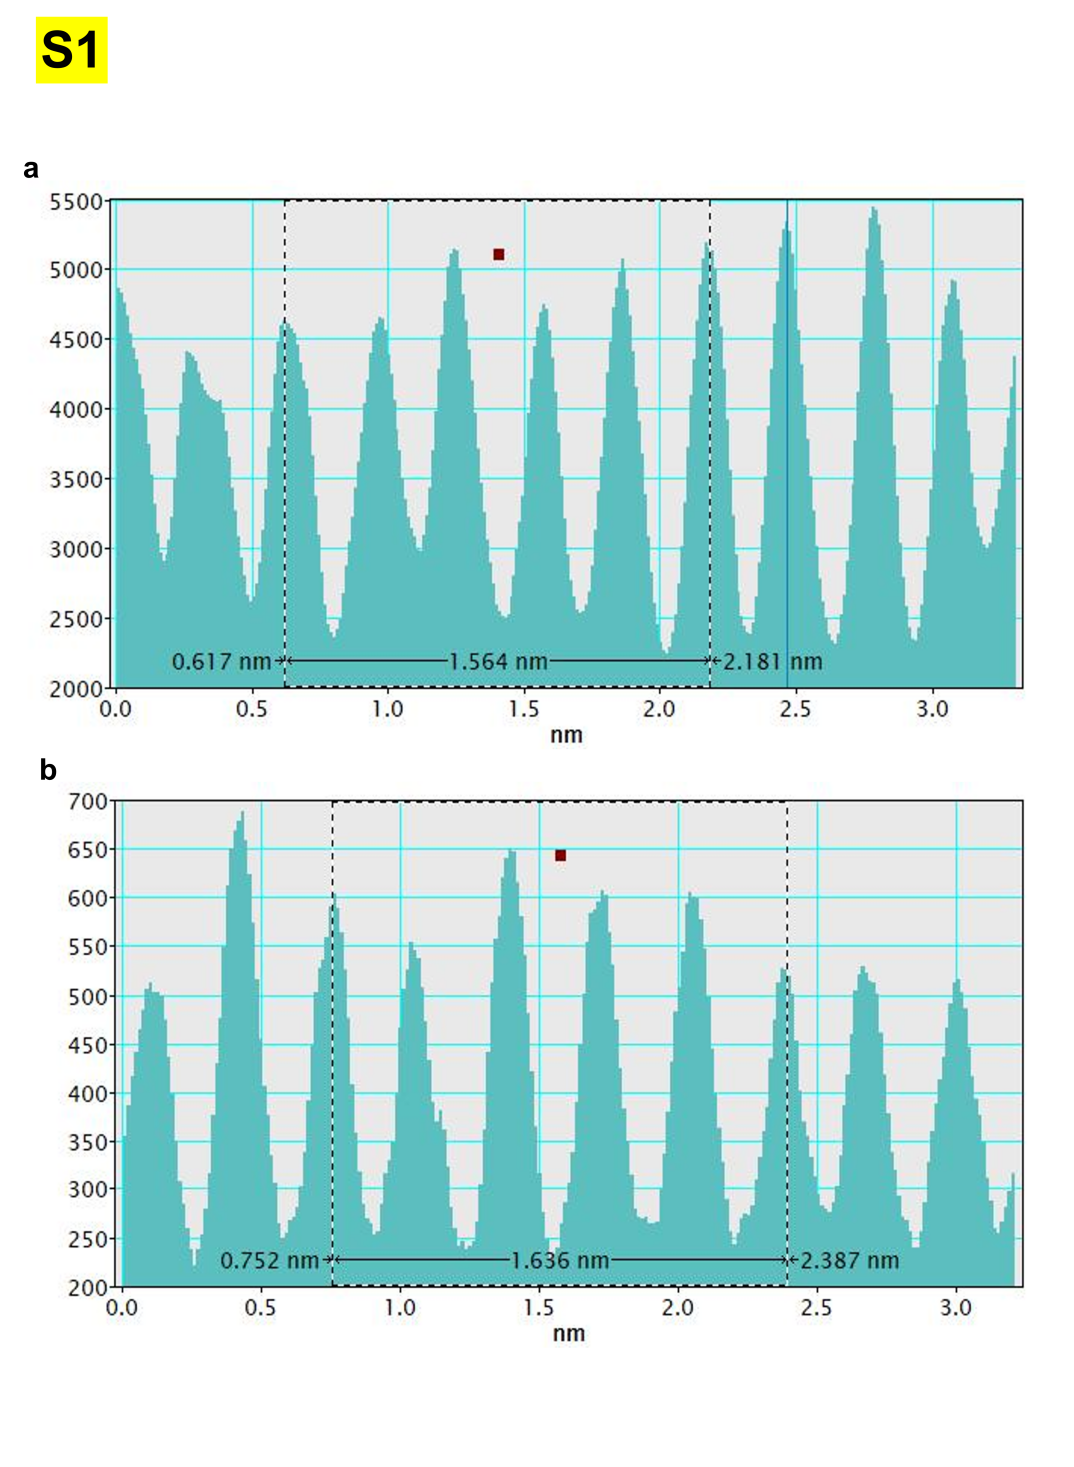


**Figure S1.** The fringe spacing of (a) CeO2 and (b) single-atom Pt/CeO2 processed by Digital Micrograph. According to the direction of vertical stripes, the average of five peaks is lattice fringe spacing.


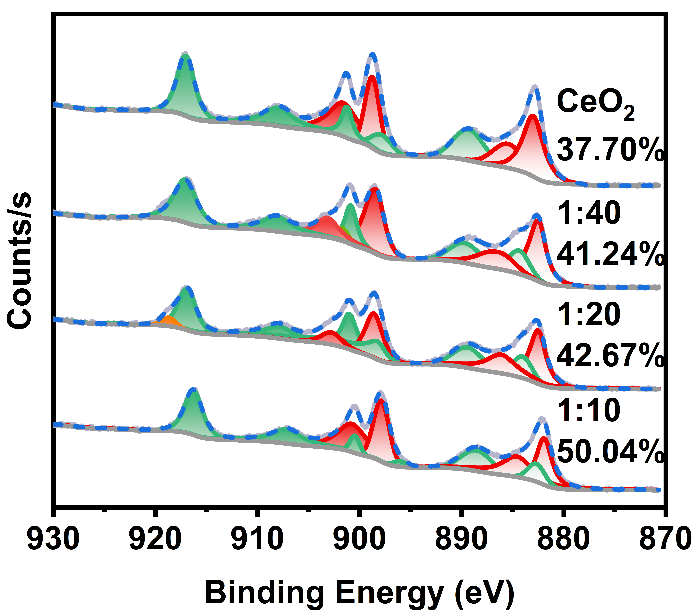


**Figure S2.** XPS Ce3d spectra of CeO2 and single-atom Pt/CeO2 with different Pt doping ratios. The proportion of Ce3+ is marked on the right side of the corresponding image.


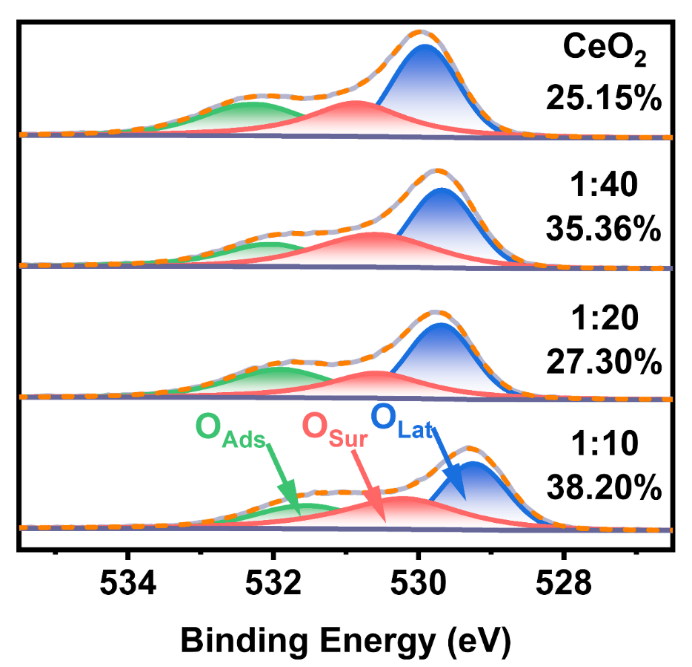


**Figure S3.** XPS O1d spectra of CeO2 and single-atom Pt/CeO2 at different doping ratios. The values on the right of figure correspond to OSur/(OAds+ OSur+ OLat).


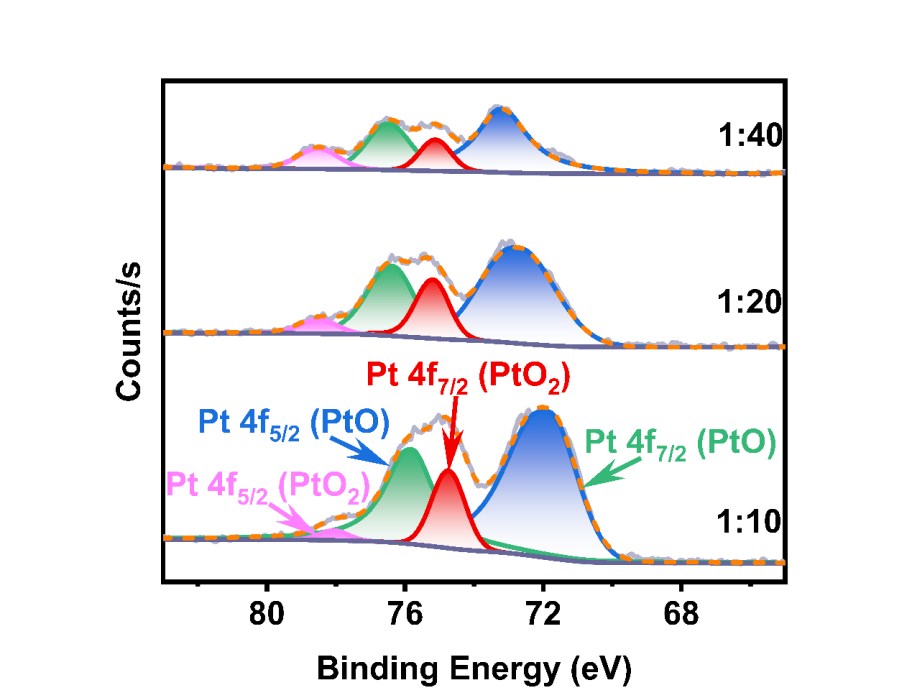


**Figure S4.** XPS Pt4f spectra of single-atom Pt/CeO2 at different doping ratios.


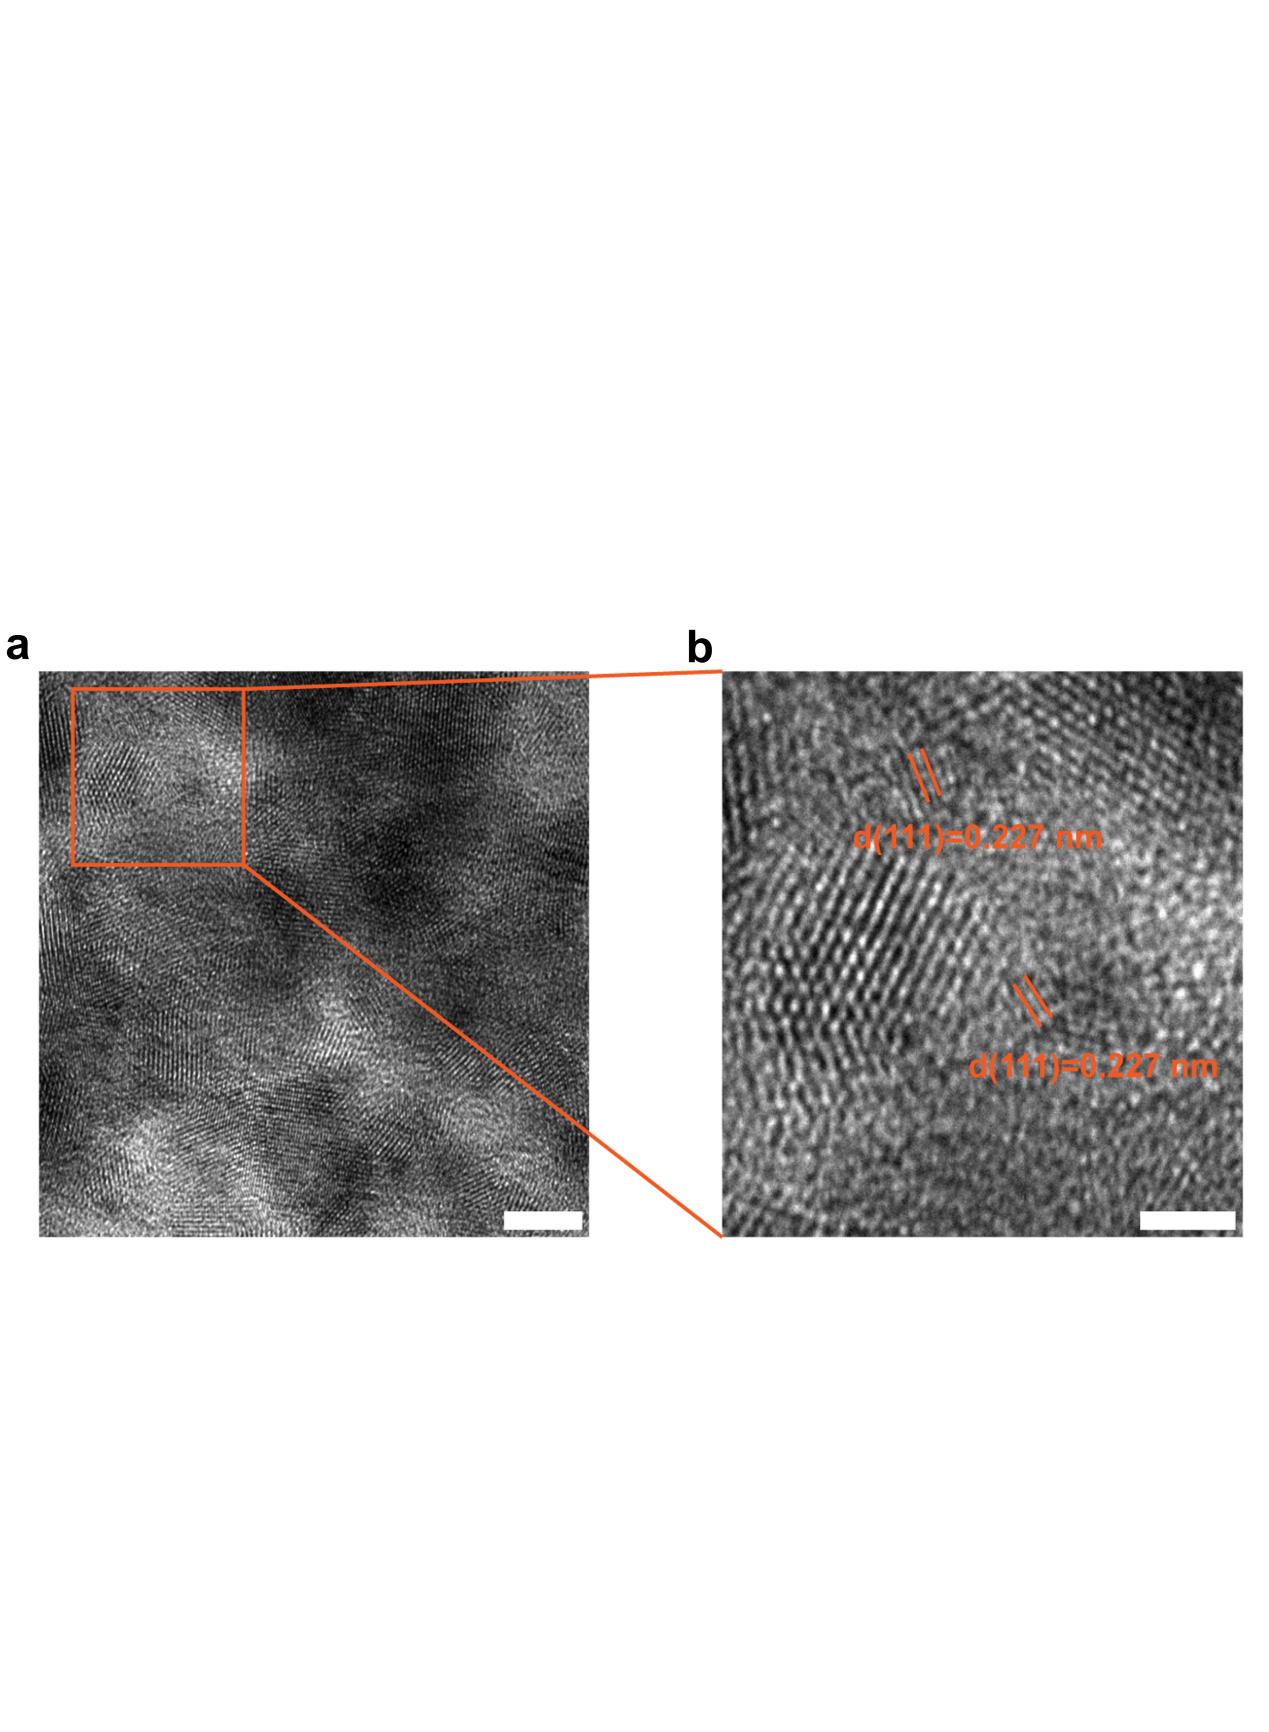


**Figure S5.** (a) TEM and (b) HRTEM images of single-atom Pt/CeO2 with Pt doping at 1:7. (Scale bar = 5 nm, 2 nm in enlarged image).


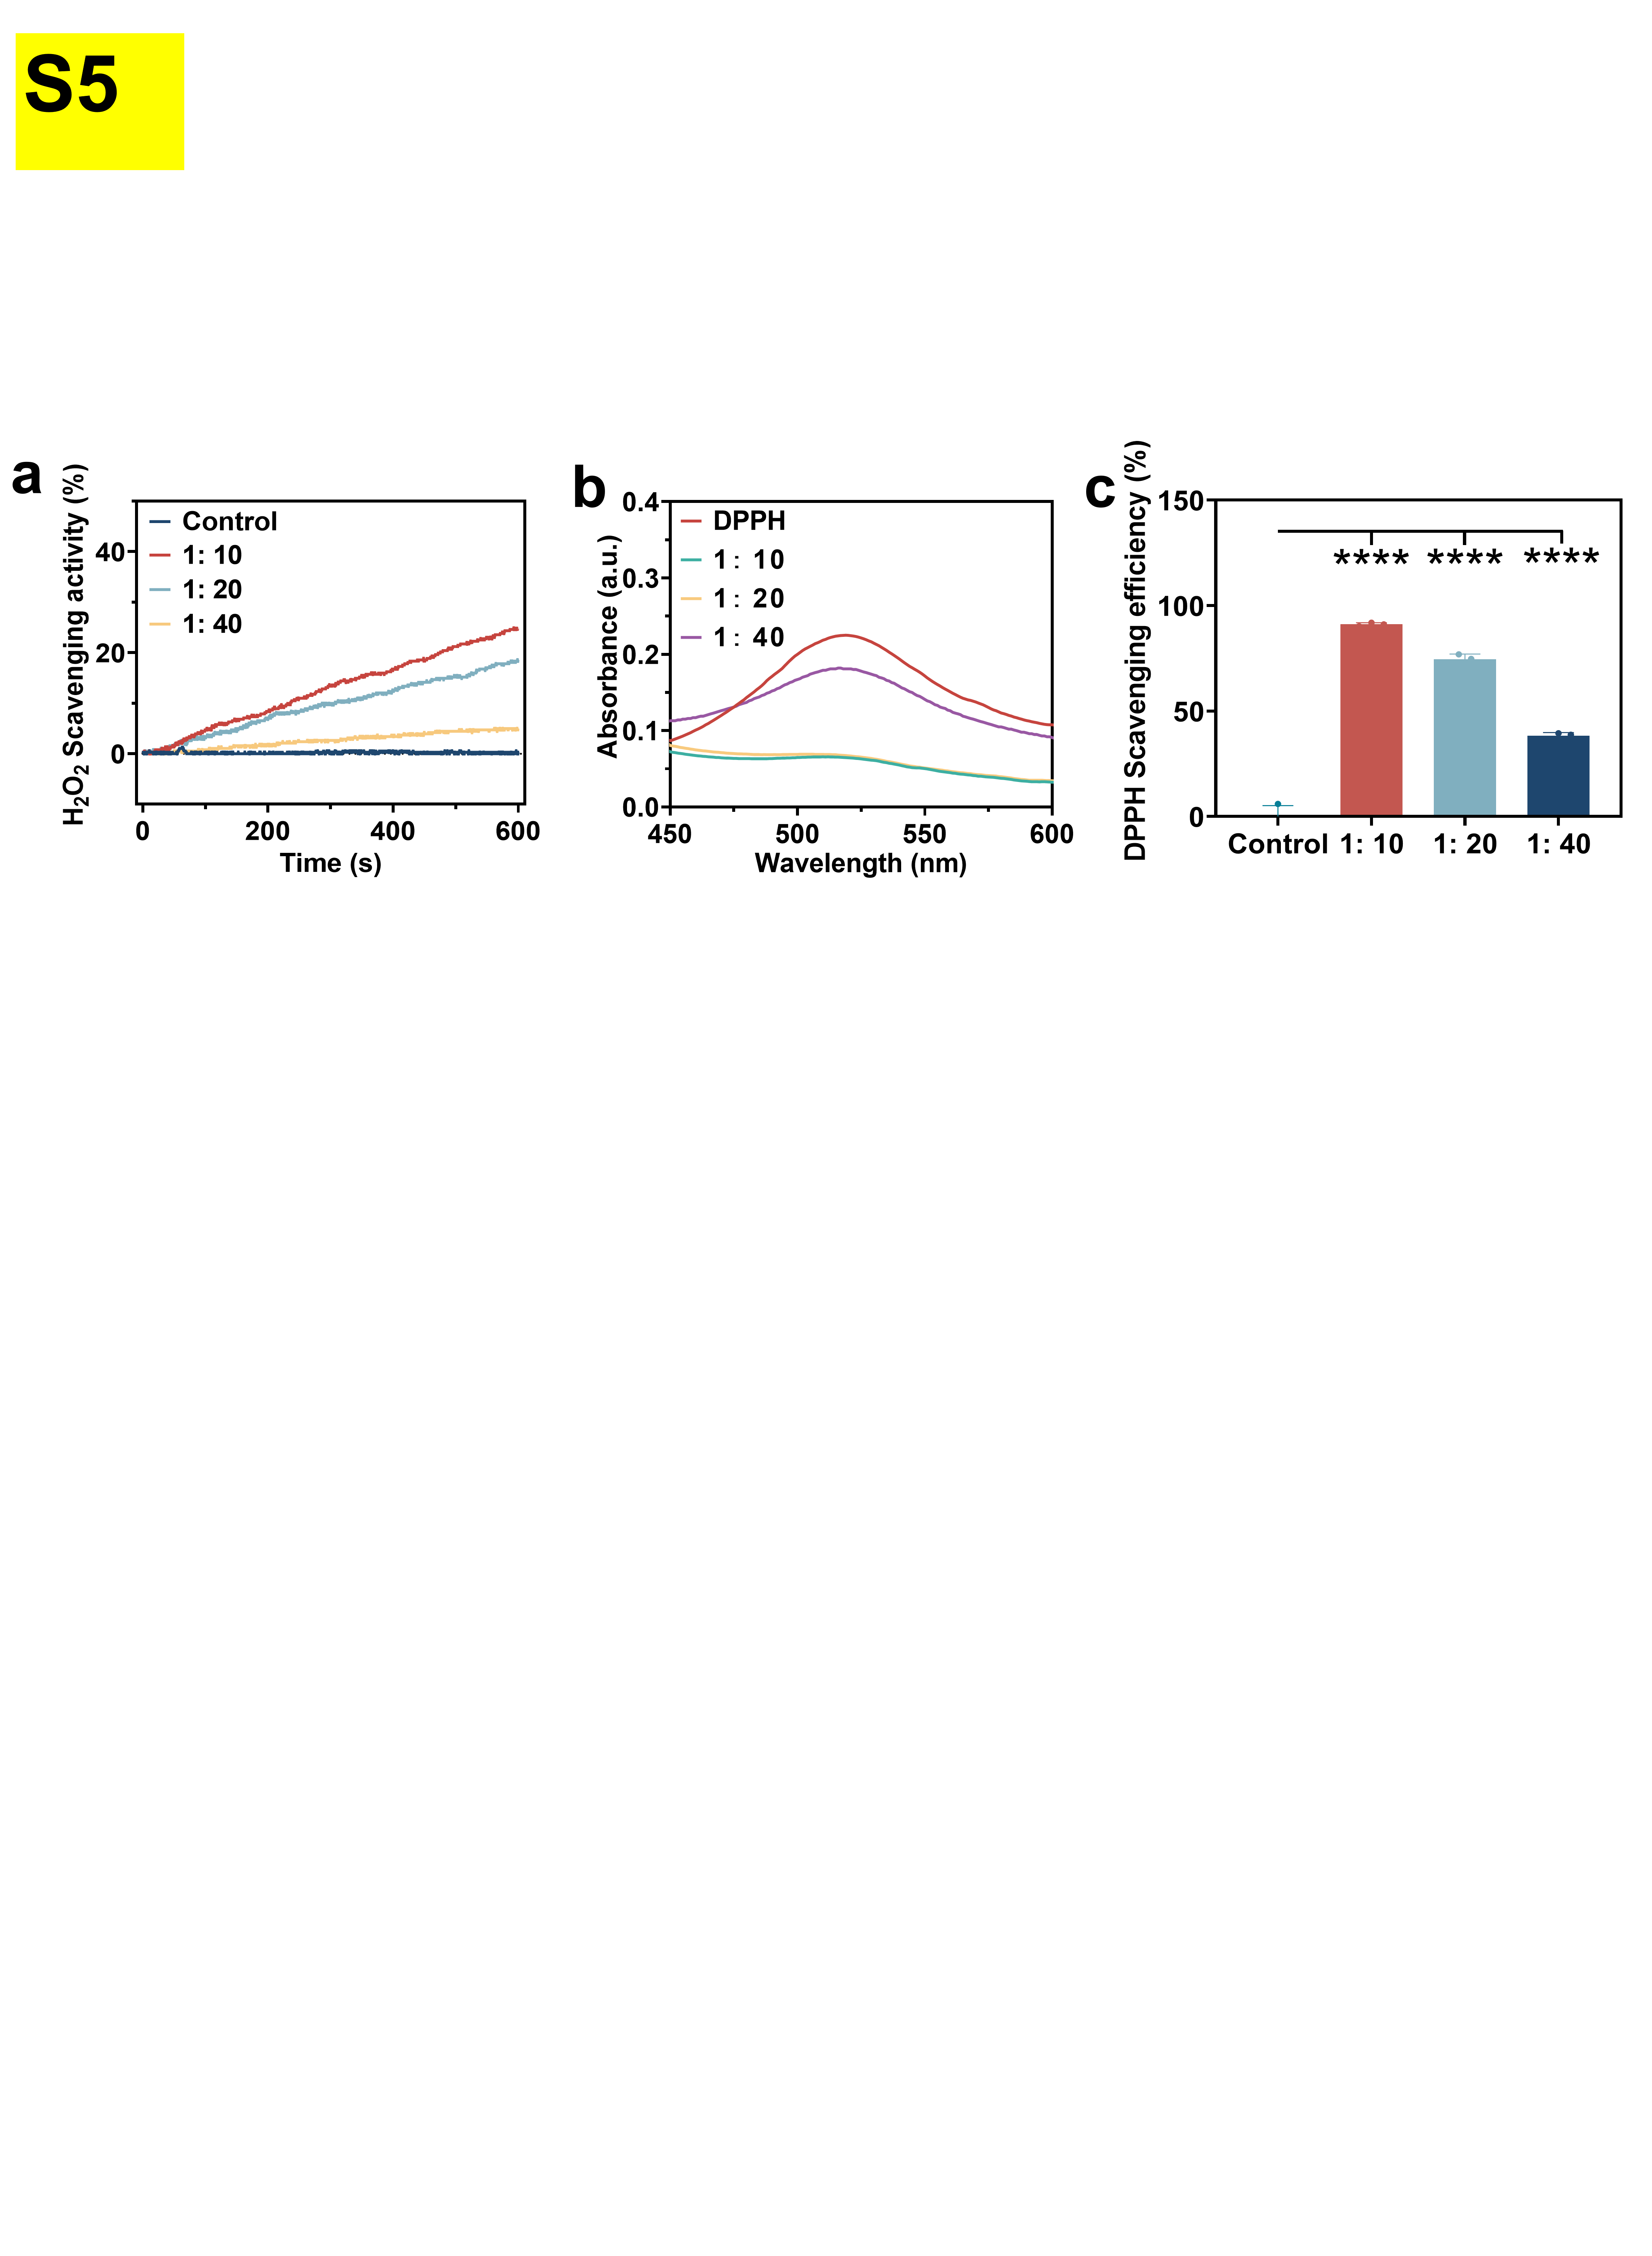


**Figure S6.** The multienzyme-mimetic abilities of single-atom Pt/CeO2 at different Pt-doping ratios. (a) H2O2, (b) and (c) DPPH-scavenging activities of single-atom Pt/CeO2 nanozymes at different Pt doping ratios.


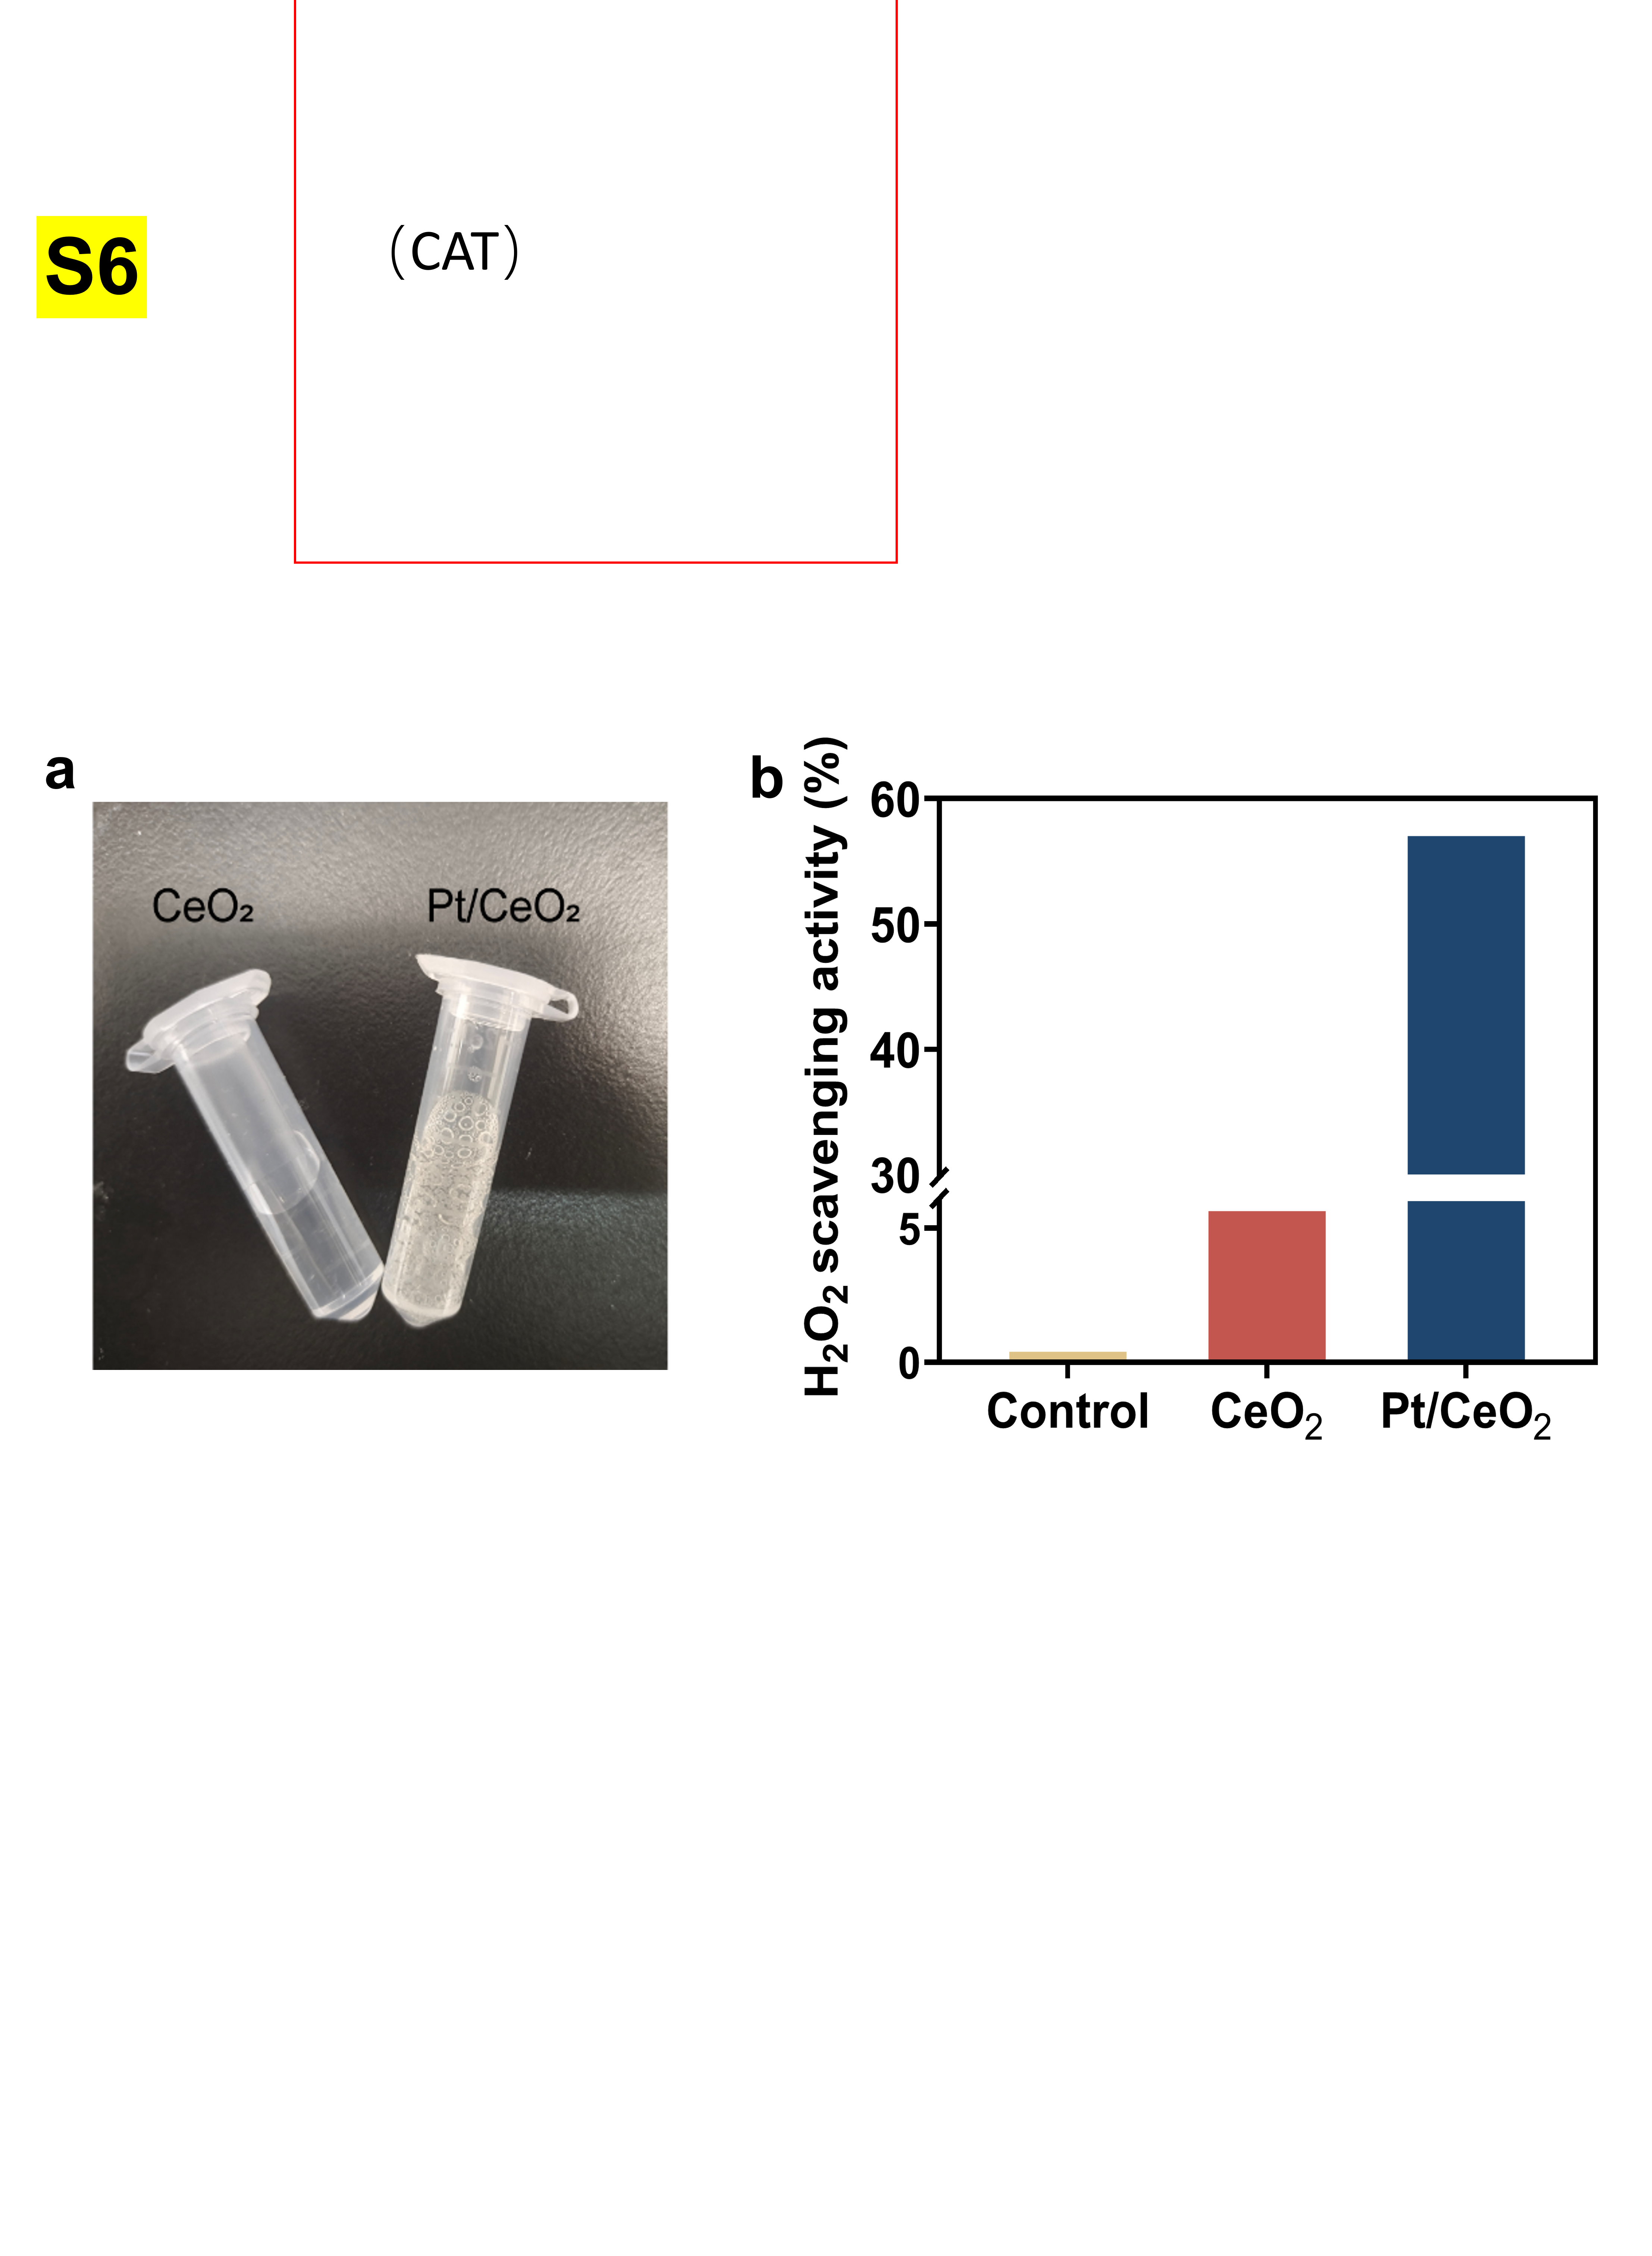


**Figure S7.** The diagram of bubbles produced by decomposition of H2O2 into O2 at the presence of CeO2 and single-atom Pt/CeO2.


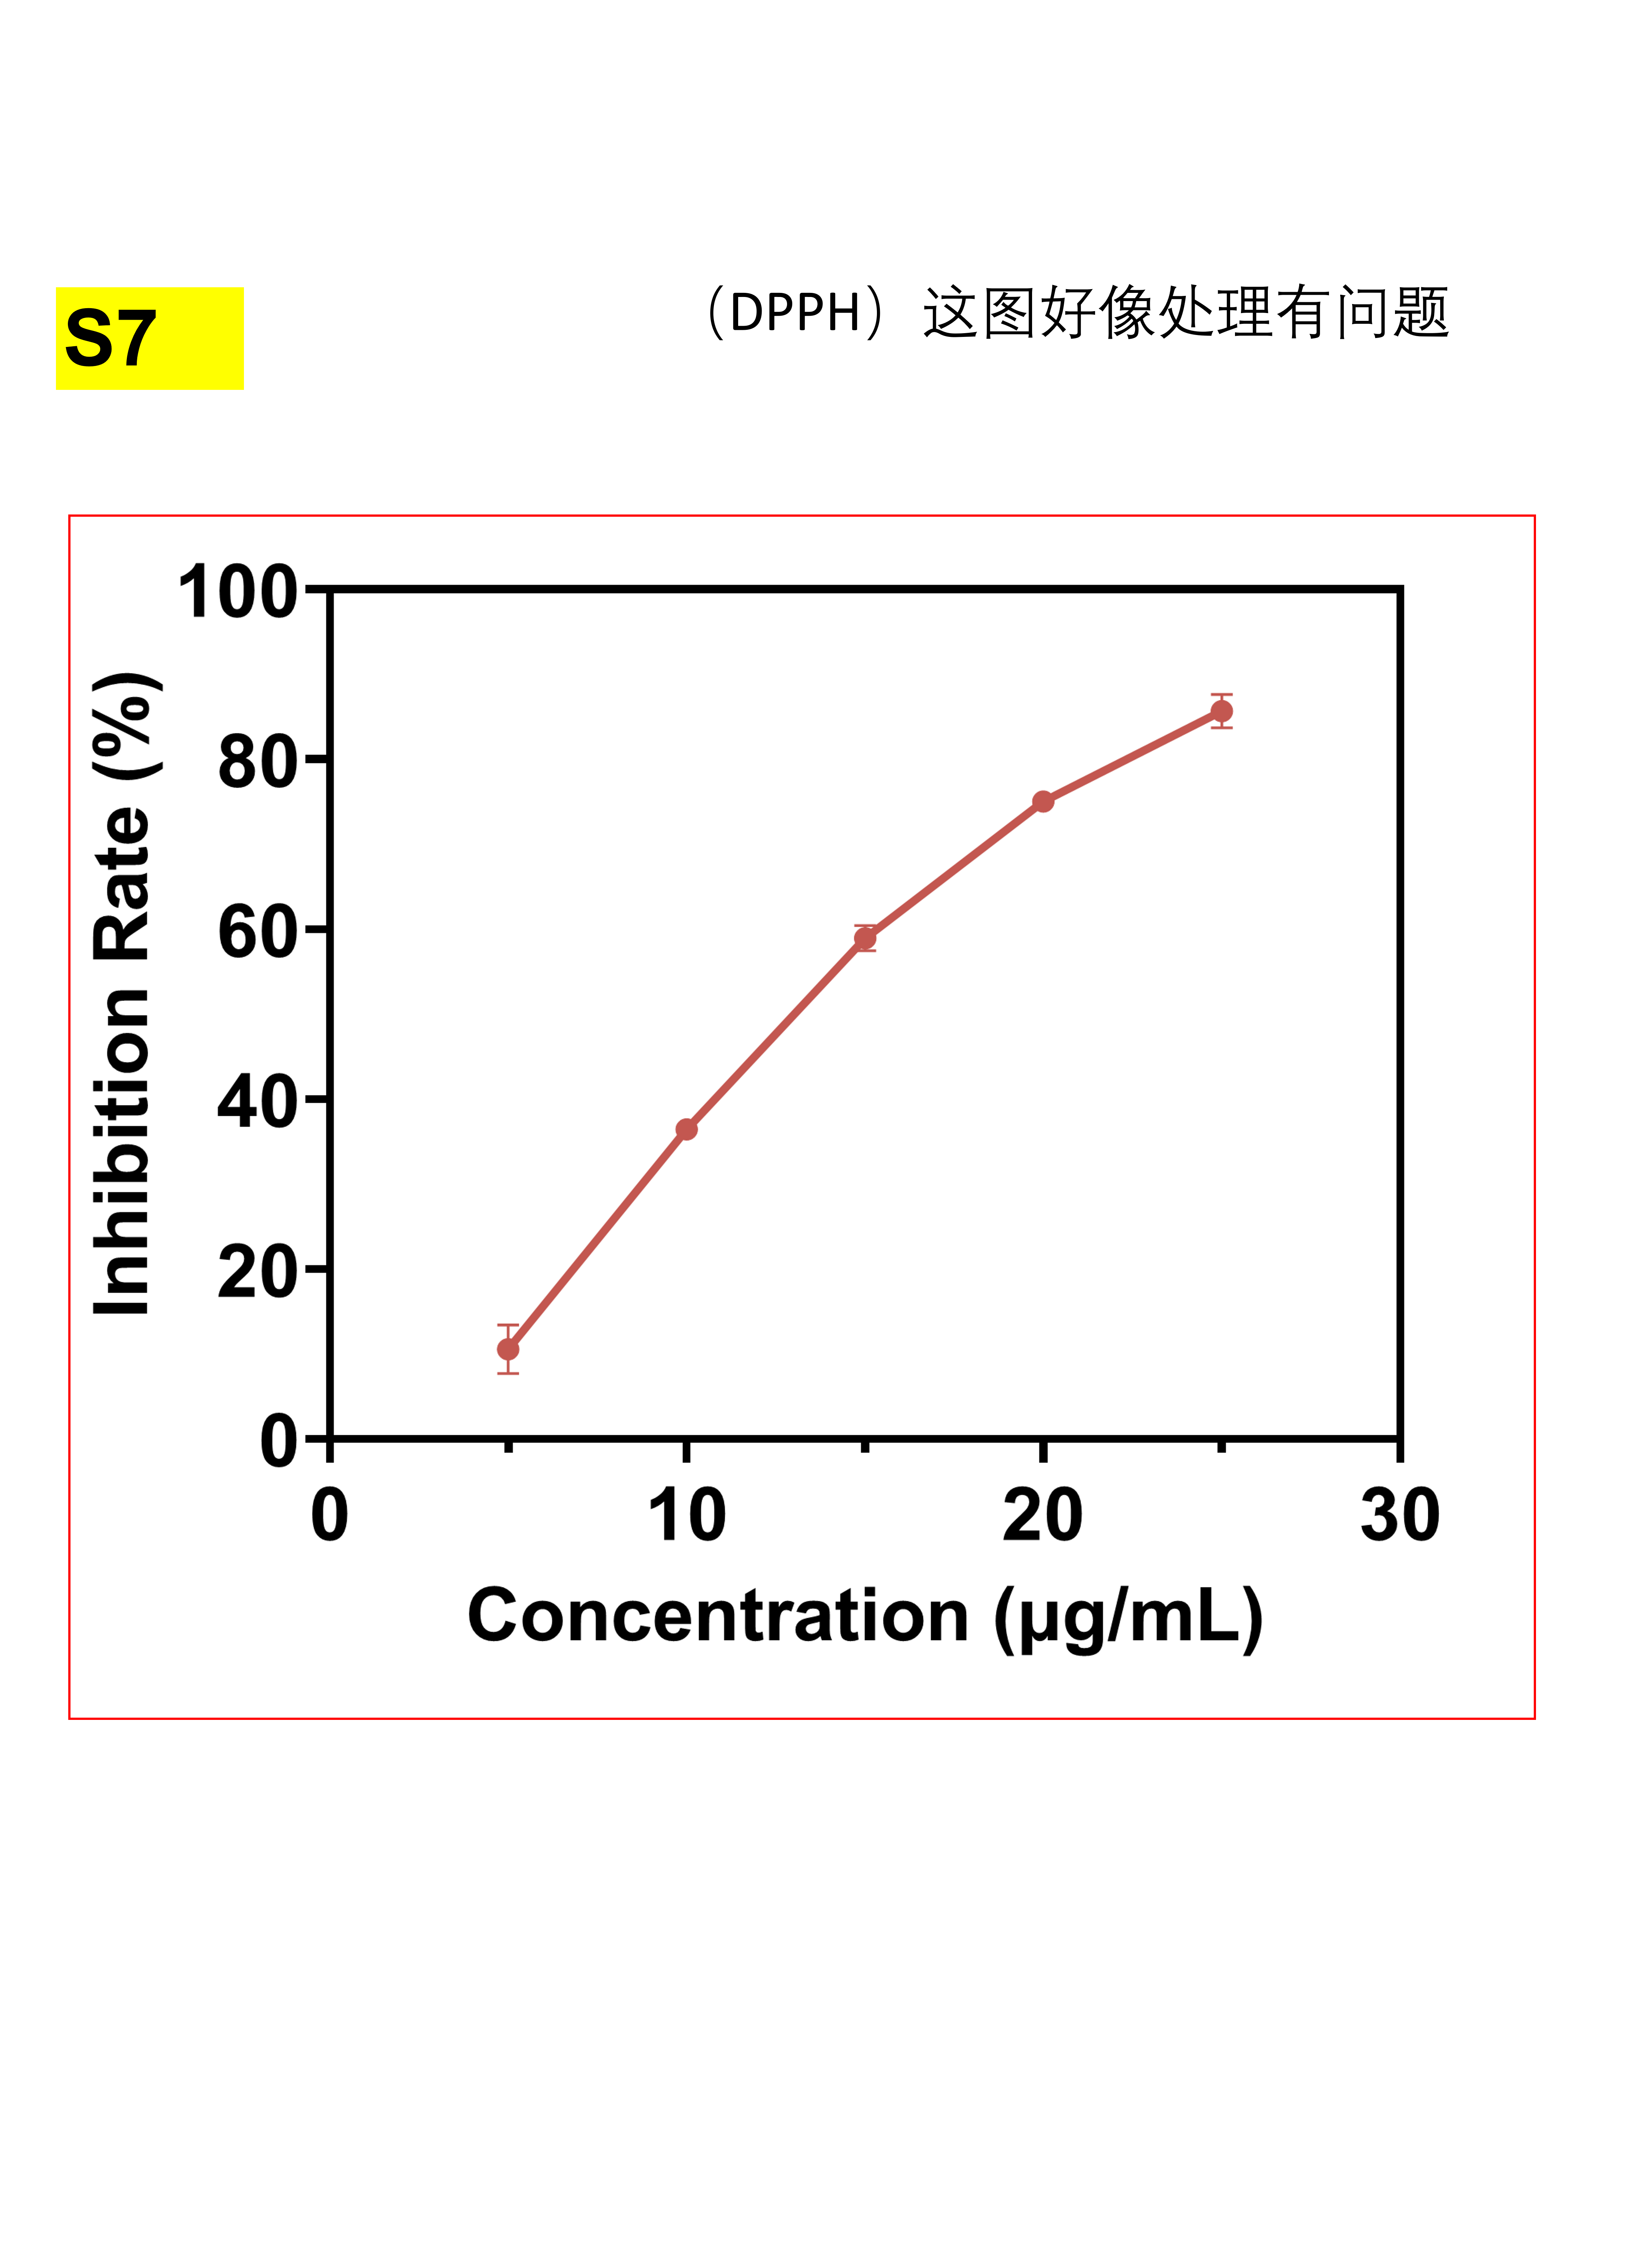


**Figure S8.** DPPH• removal efficiency of single-atom Pt/CeO2 at different concentrations.


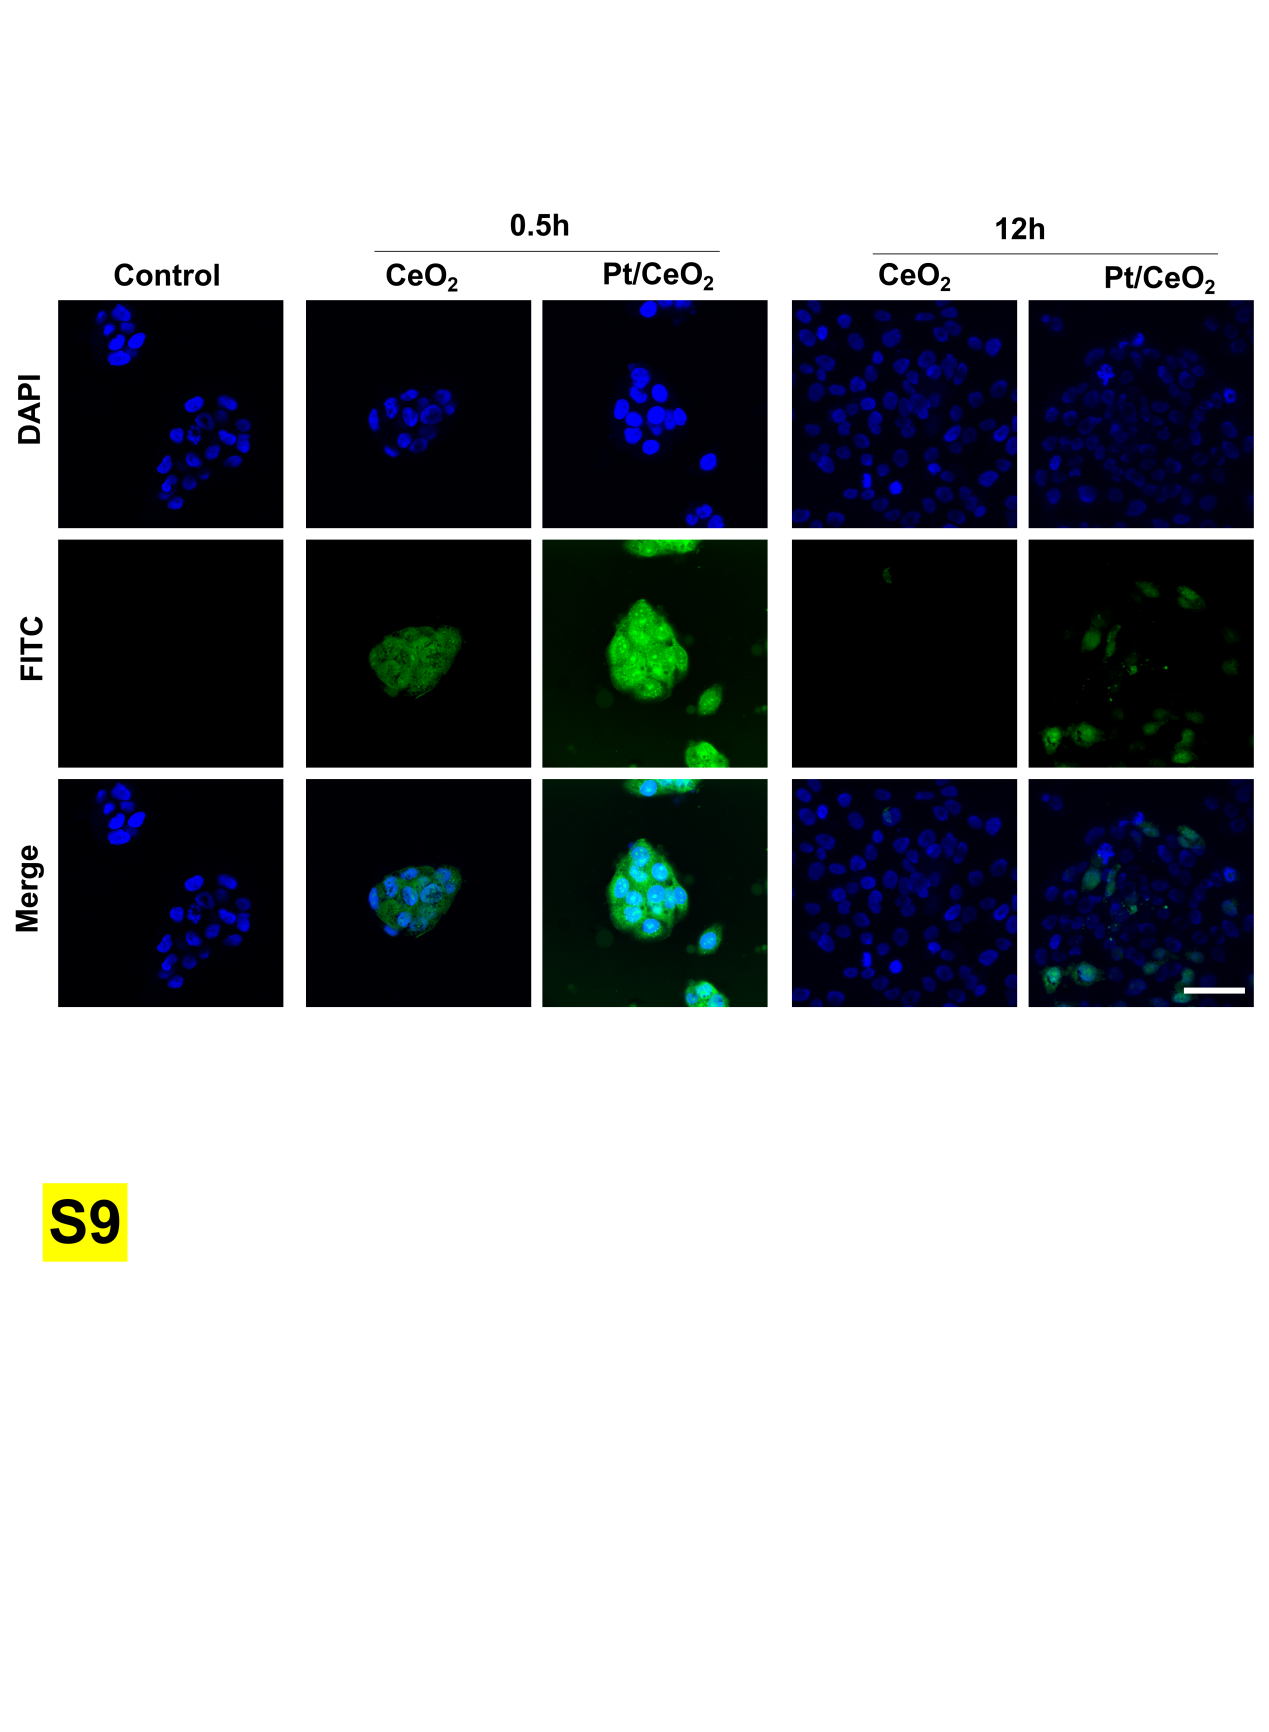


**Figure S9.** The cellular uptake of CeO2 and single-atom Pt/CeO2 by HCECs through fluorescence staining after 0.5 h and 12 h incubation. The green fluorescence represents the location of CeO2 and single-atom Pt/CeO2. A representative image of three biological replicates from each group is shown. (Scale bar = 50 µm)


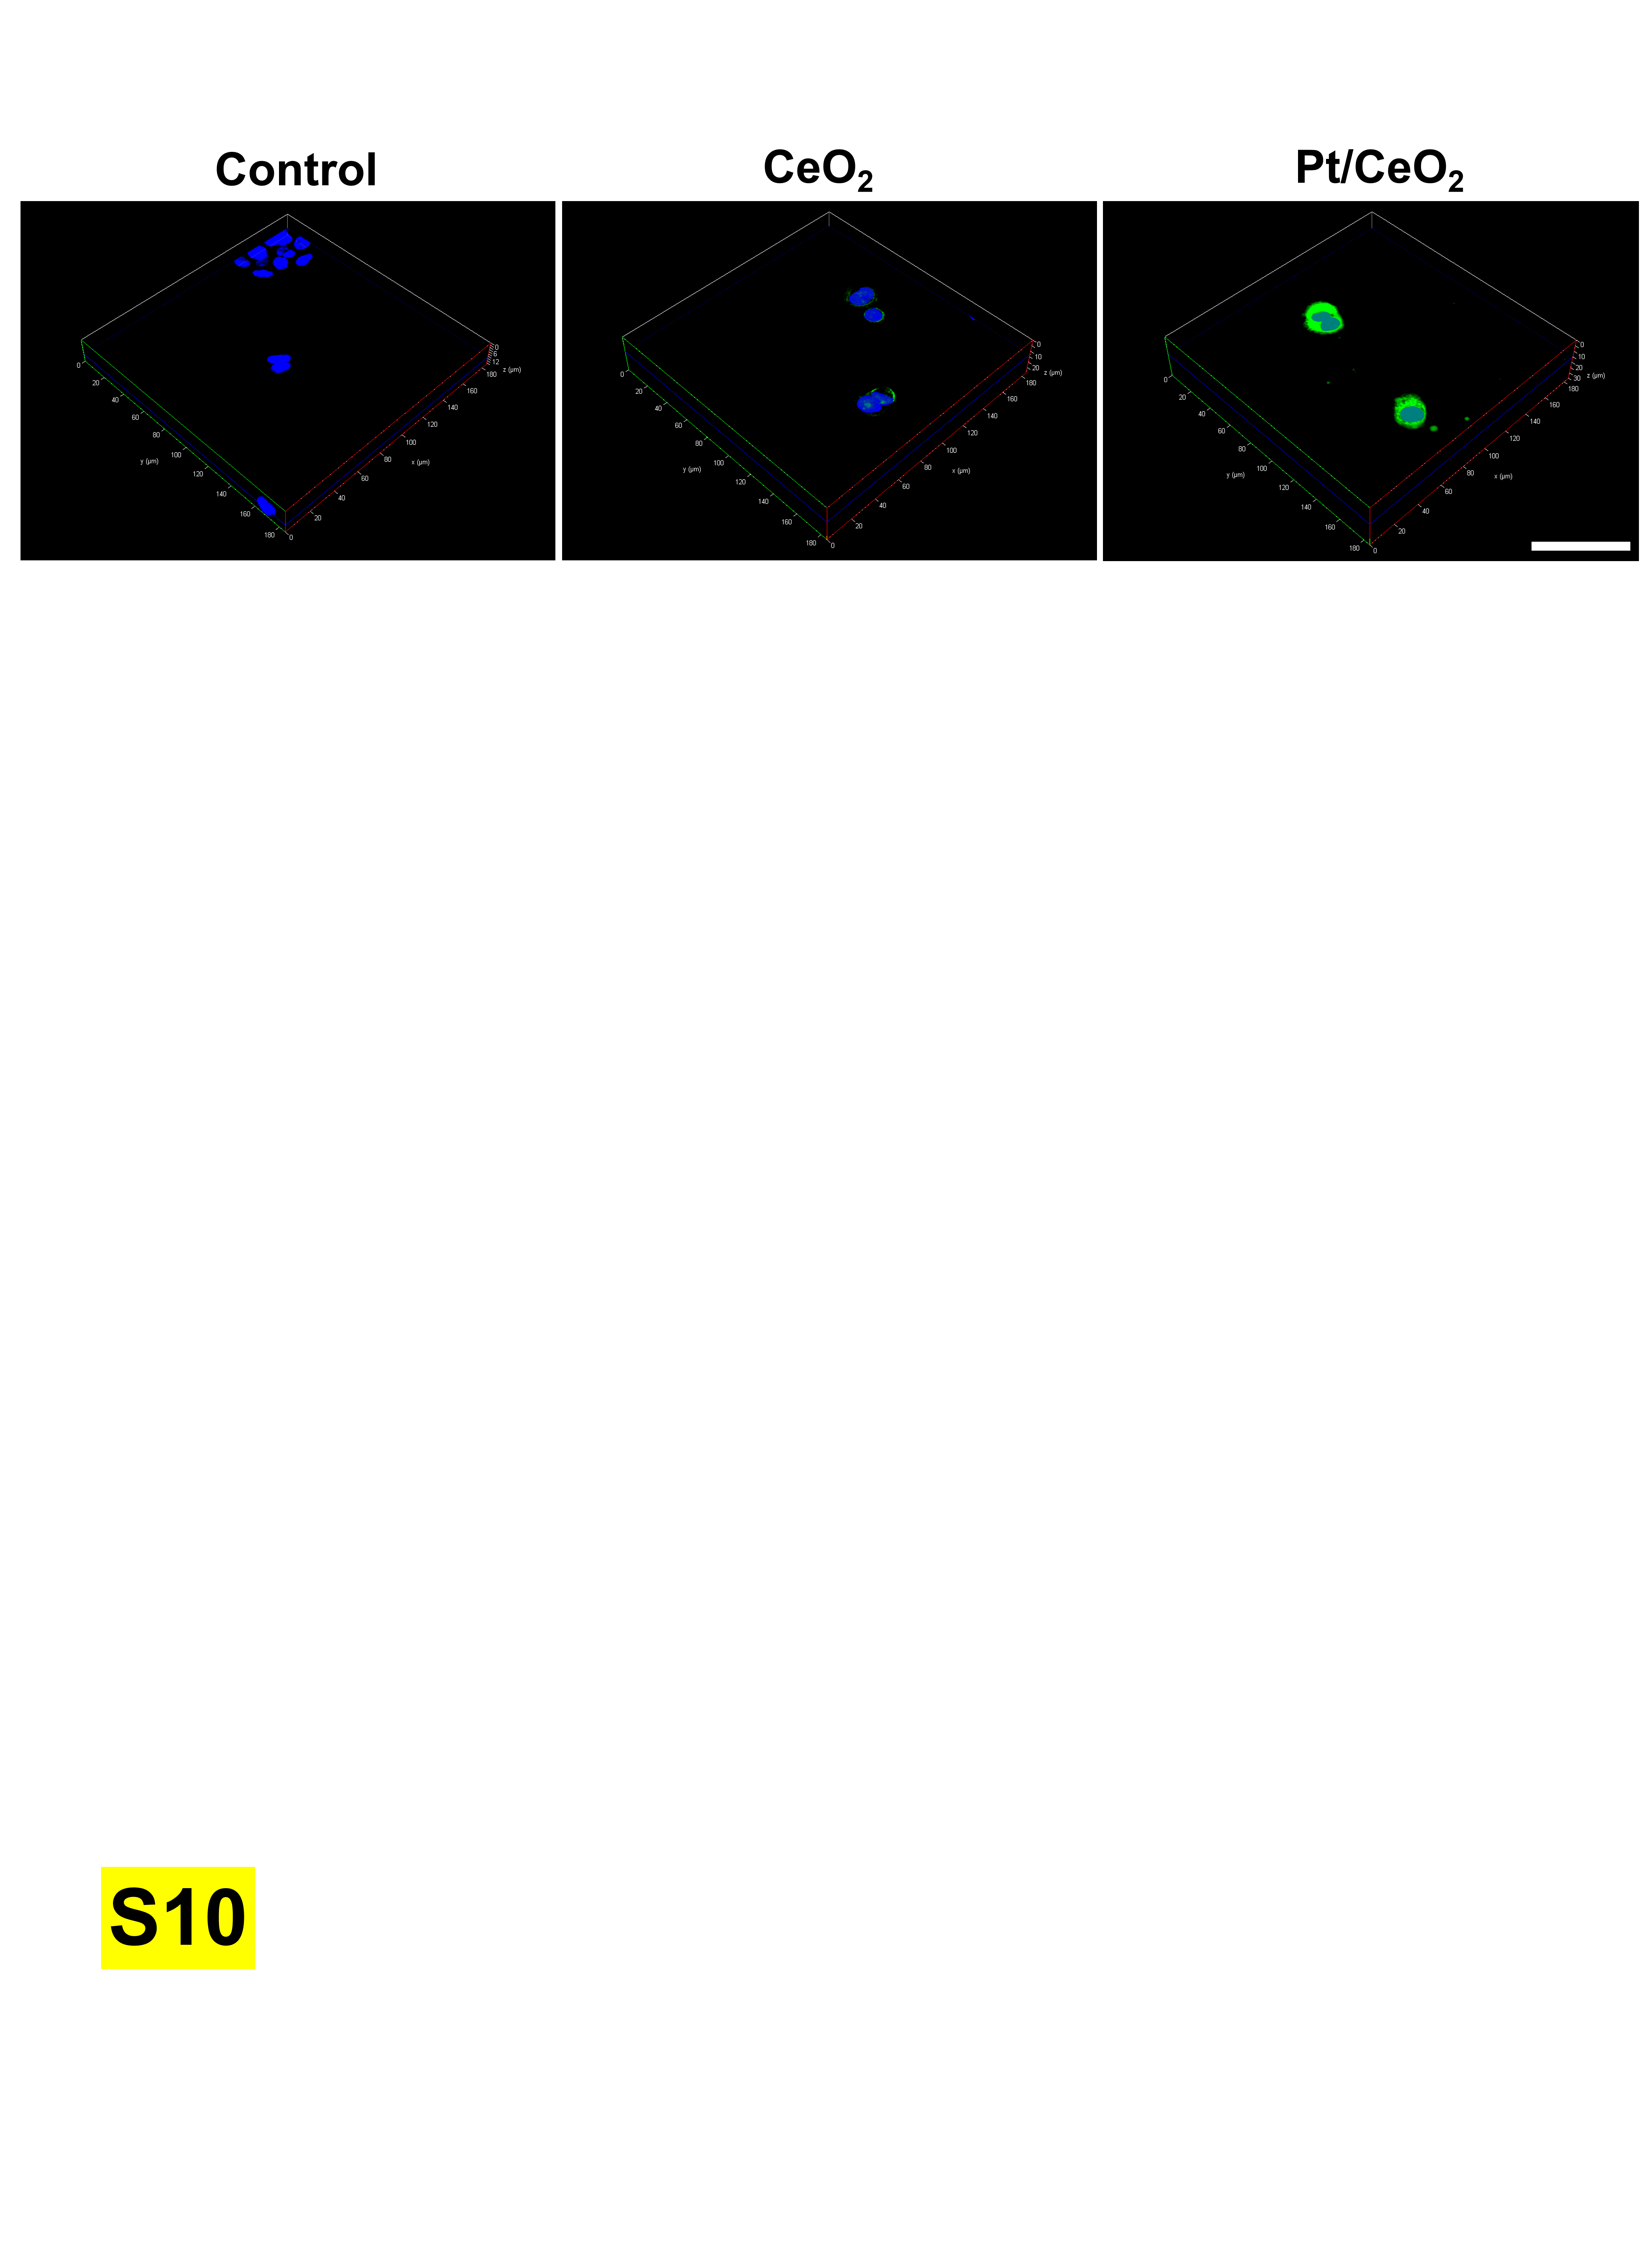


**Figure S10.** Representative 3D fluorescent images of cellular phagocytosis to CeO2 and single-atom Pt/CeO2 by HCECs. (Scale bar = 50 µm)


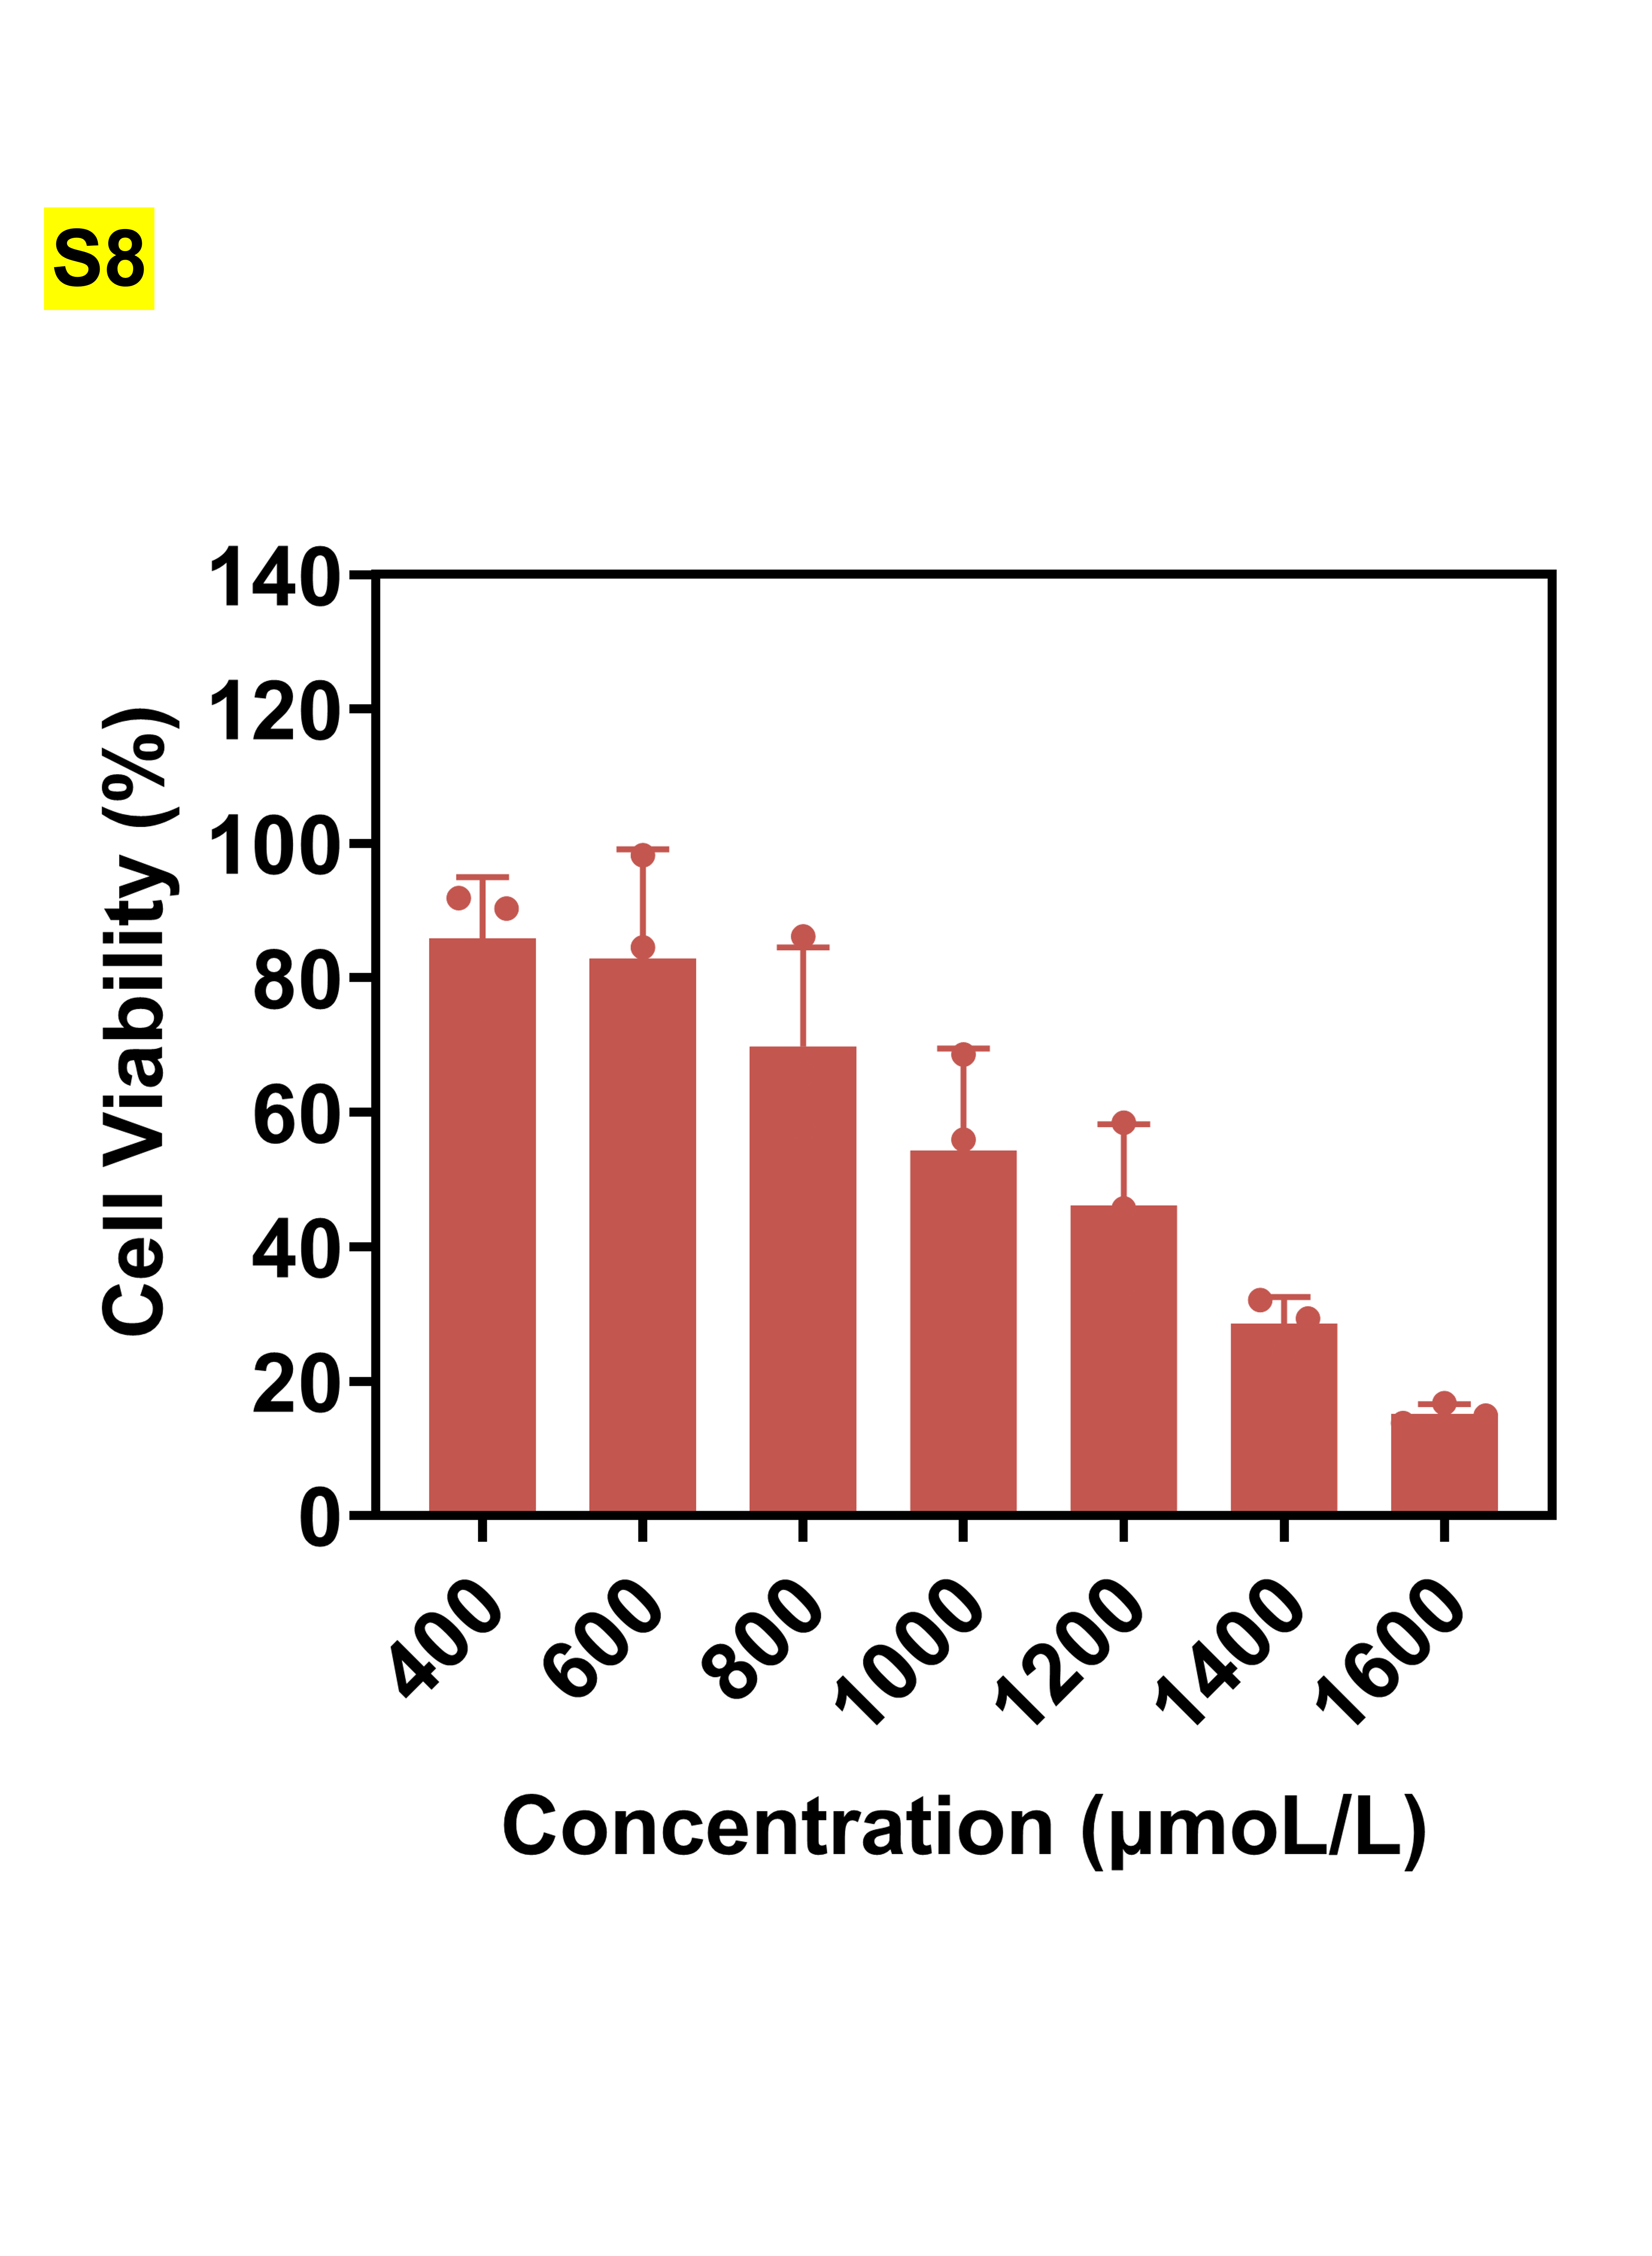


**Figure S11.** Cell survival rate of HCECs after incubation with different concentrations of H2O2.


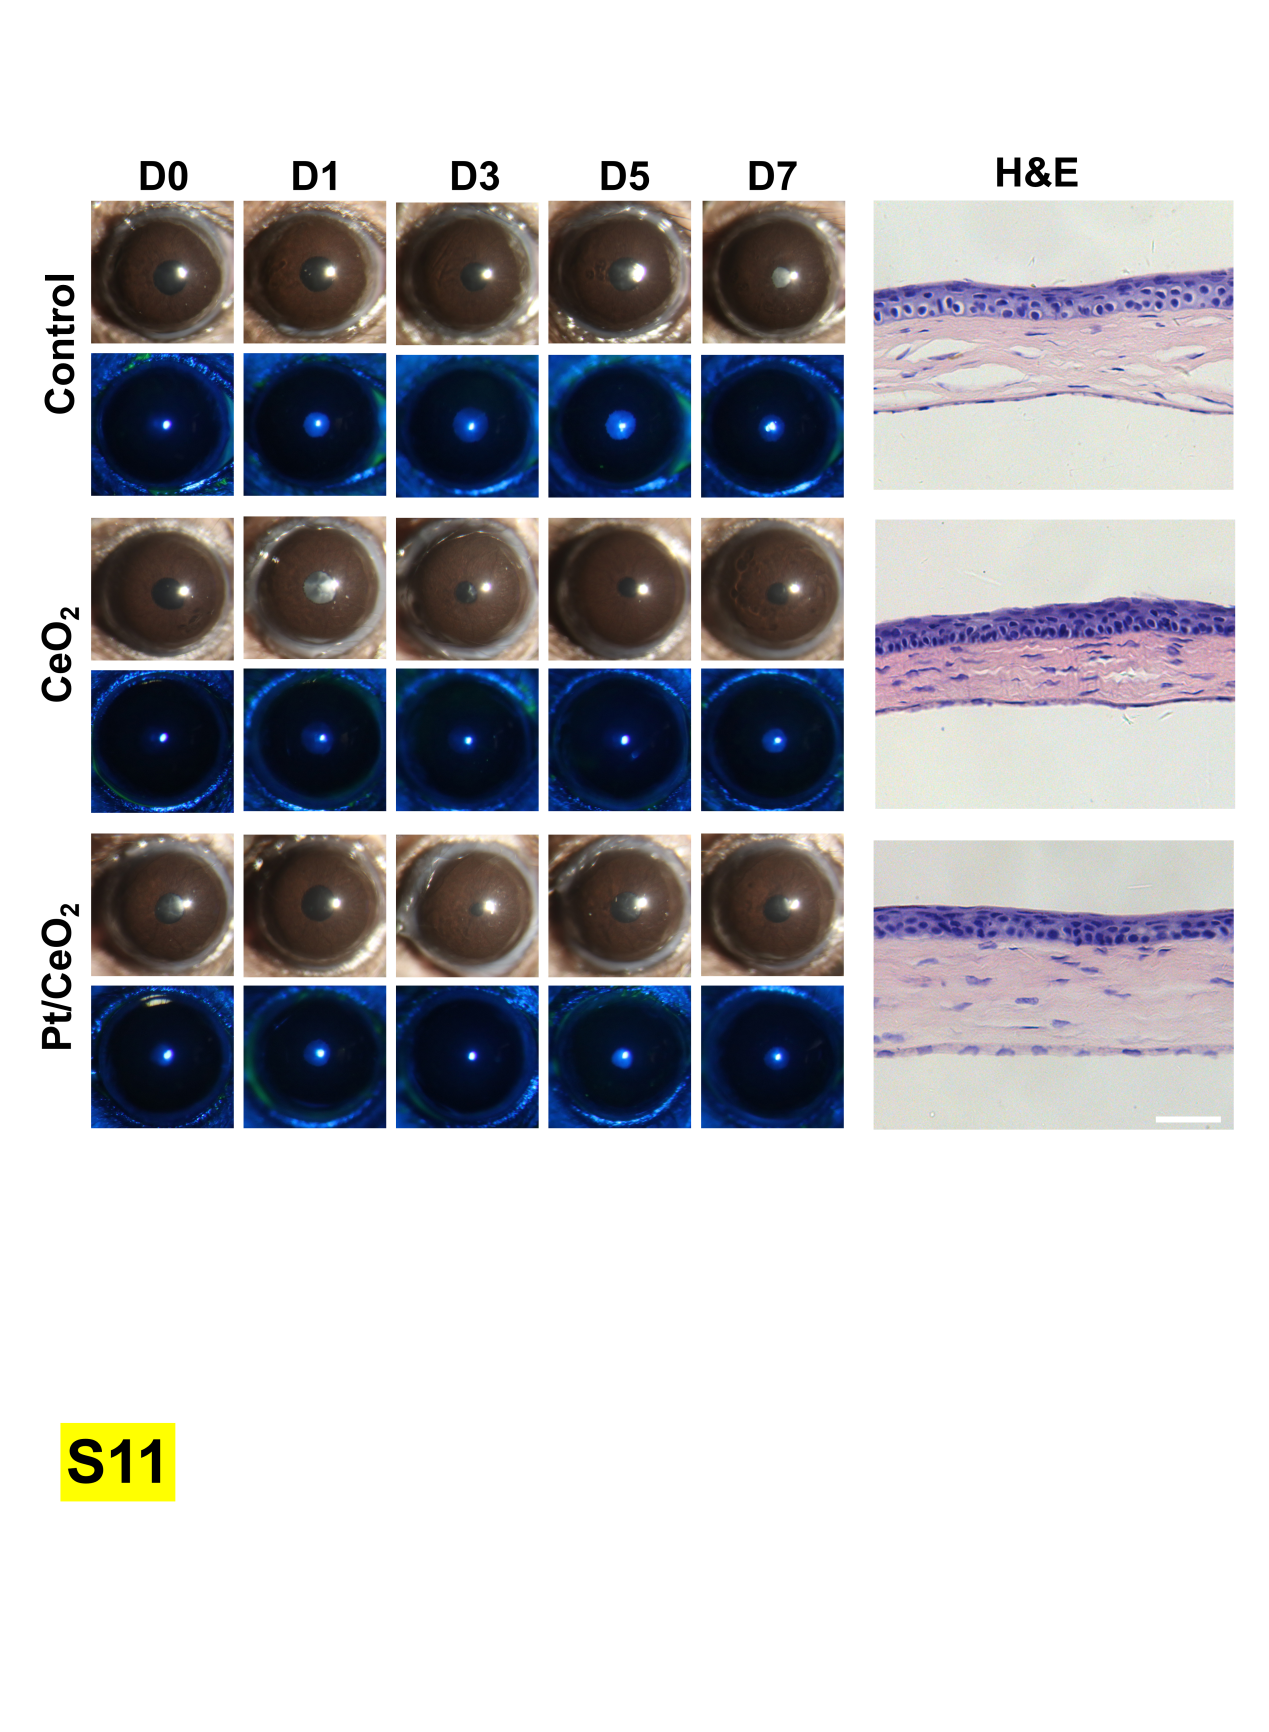


**Figure S12.** Biocompatibility experiments. Slit-lamp images and H&E staining observation of corneas after CeO2 and single-atom Pt/CeO2 drops treatments for 7 days. (Scale bar = 50 µm)


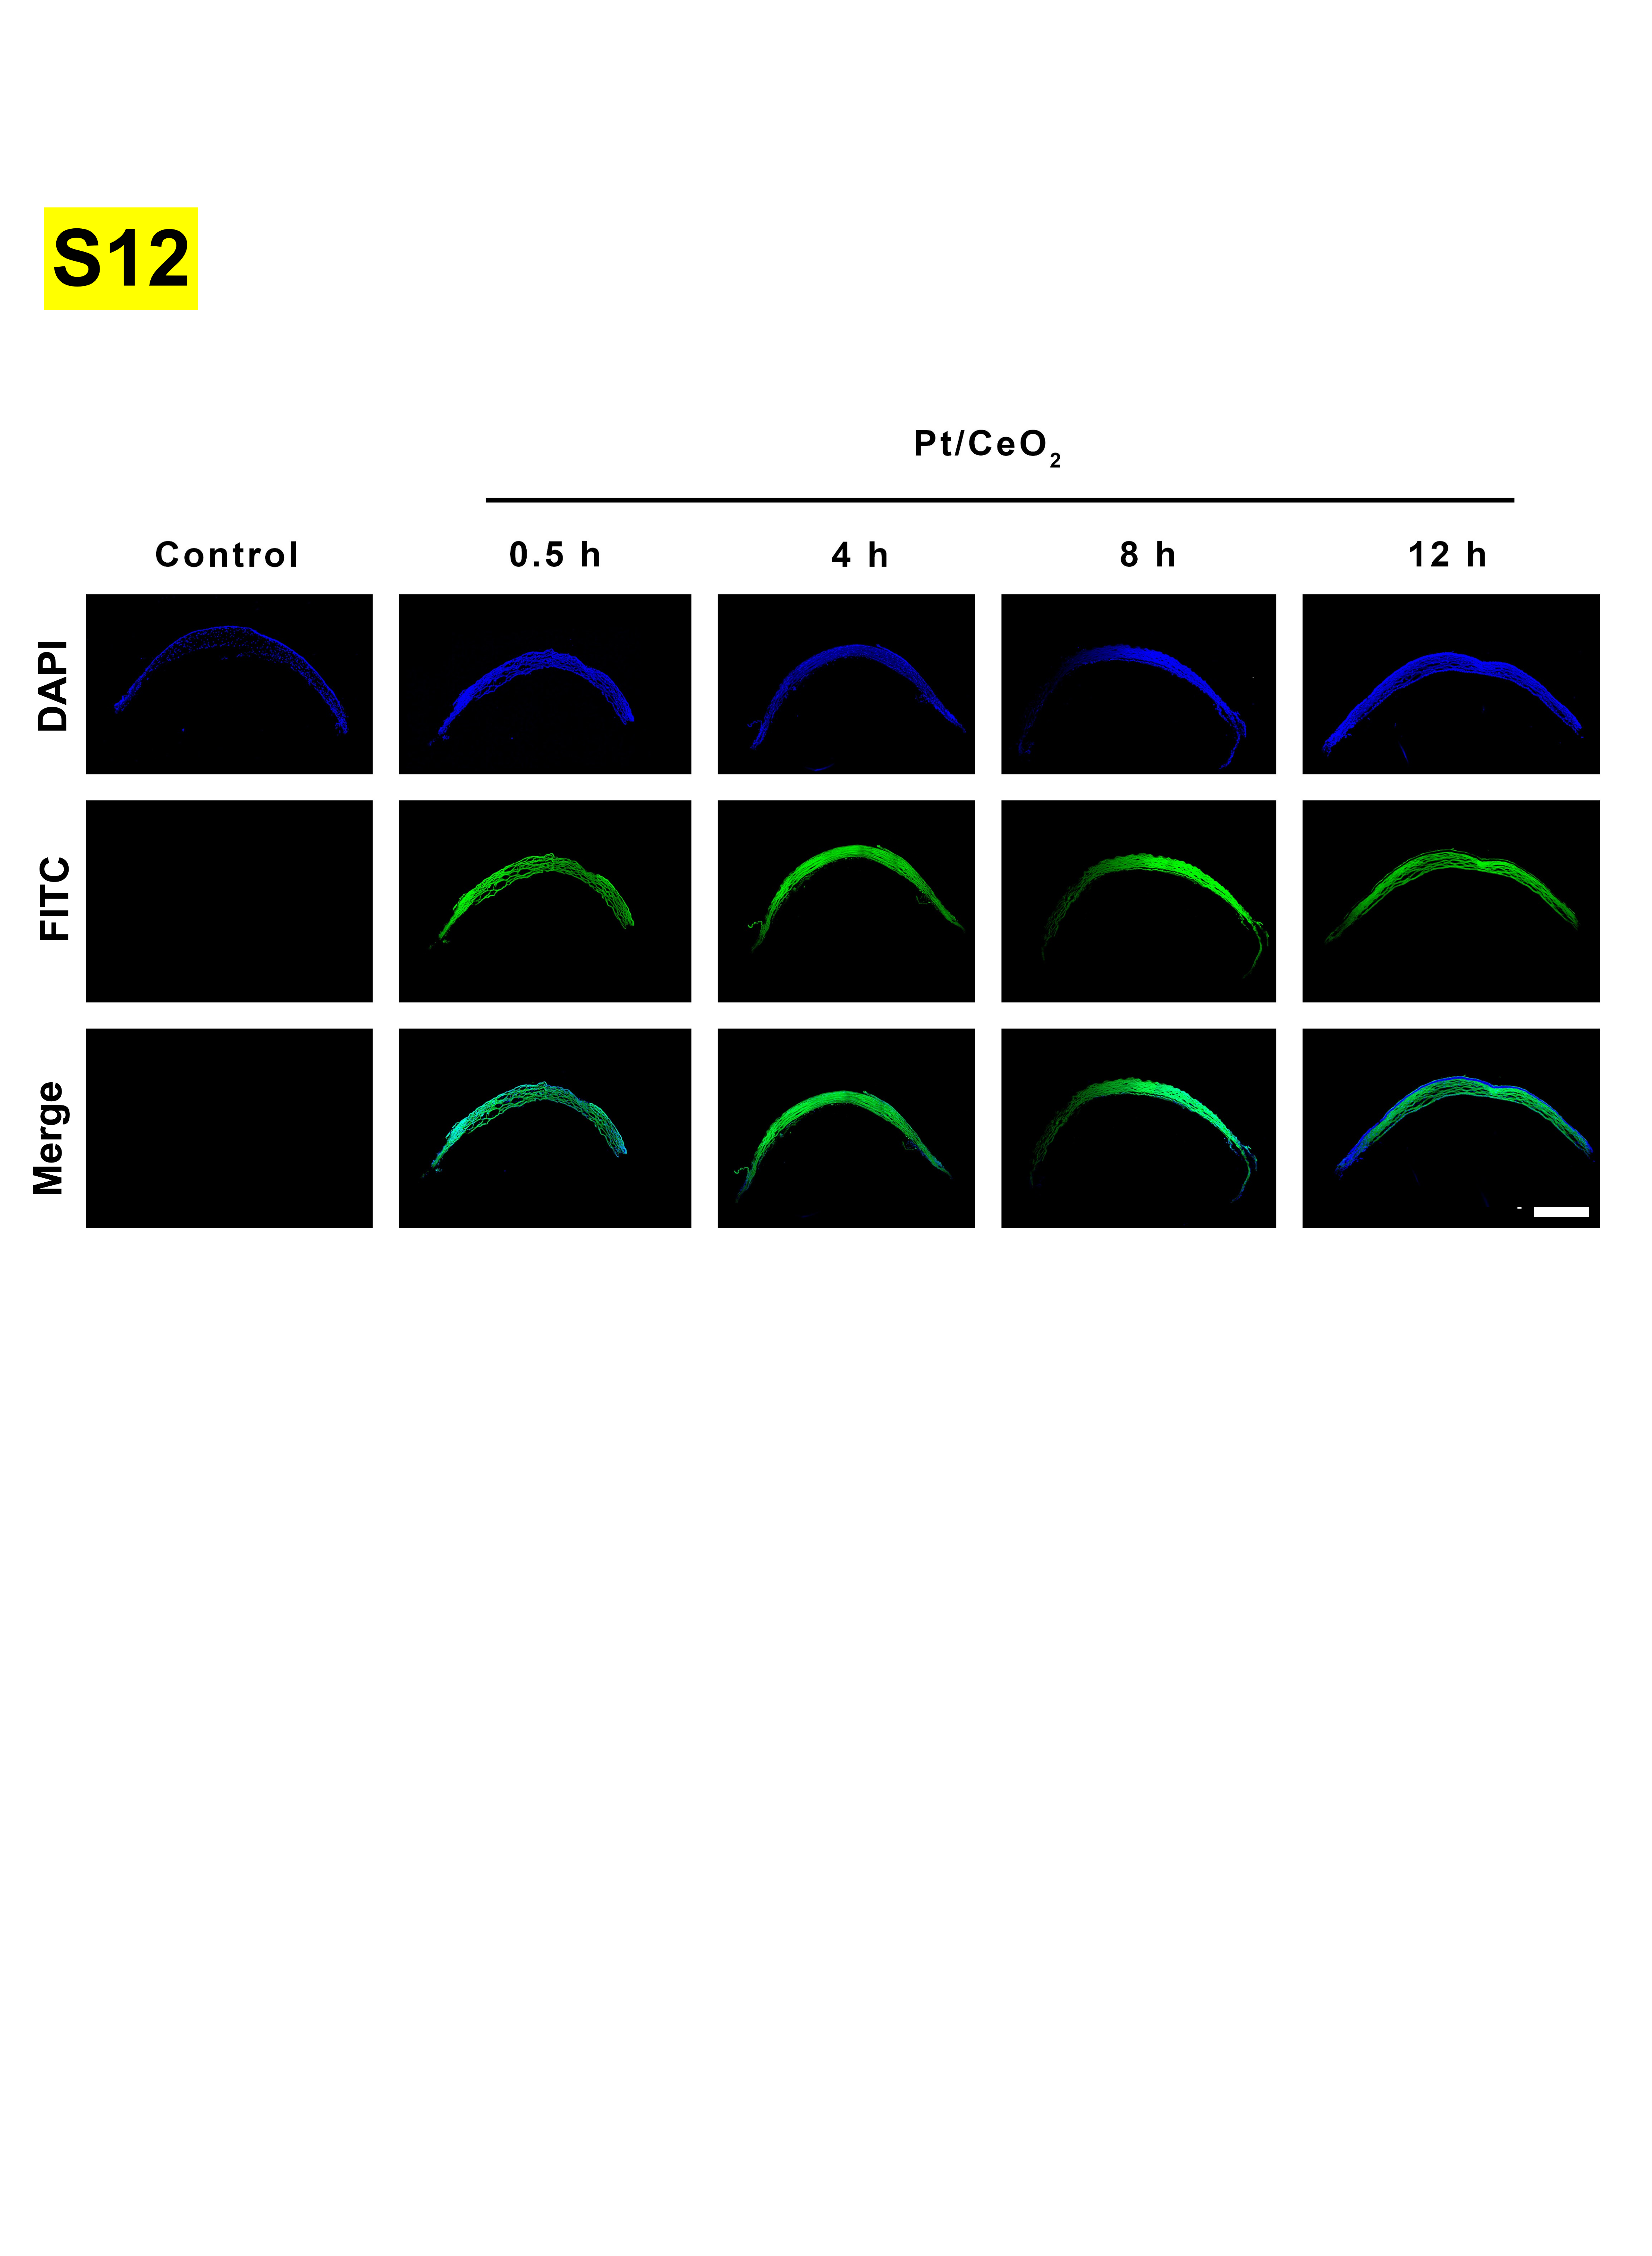


**Figure S13.** Corneal penetration of FITC labeled single-atom Pt/CeO2 on the eye surface of healthy mice. (Scale bar = 200 µm)
